# Supplementary material for: α-Neurexins couple Ca2+ channels to synaptic vesicle exocytosis
Source: Springer Nature journal article supplement (doi:10.1038/nature01755), 2003-06-01

**Cortical slices:**  
Neonatal mice -  
Control and TKO

**Organoid cultures:**  
25-40 Days *in vitro*

**Light microscopic picture**  
of a cortical culture:  
Double immunofluorescence  
of vesicular GABA transporter and  
Synaptophysin

(1) Mini recordings:  
AMPA and GABA

(2) Evoked inhibitory responses:  
Paired recordings

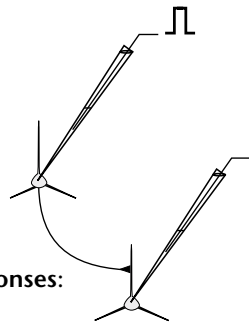

**Electron microscopic pictures**  
of asymmetric (type I) and symmetric (type II) synapses in cortical slices:

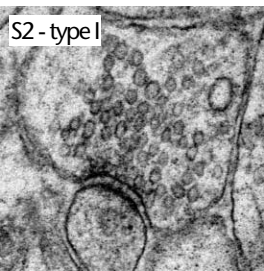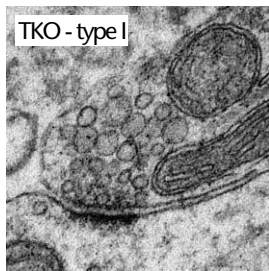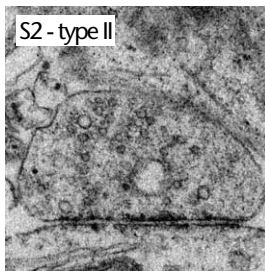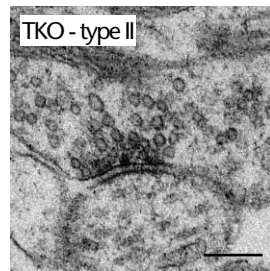

Supplement: 41586_2003_BFnature01755_MOESM6_ESM.pdf [file 41586_2003_BFnature01755_MOESM6_ESM.pdf]
