# Supplementary material for: α-Neurexins couple Ca2+ channels to synaptic vesicle exocytosis
Source: Springer Nature journal article supplement (doi:10.1038/nature01755), 2003-06-01

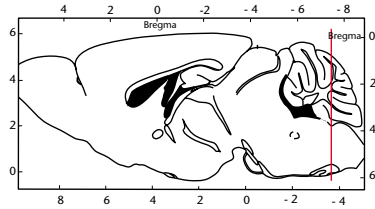

**Coordinates:**  
 Interaural -3.40 mm  
 Bregma -7.20 mm

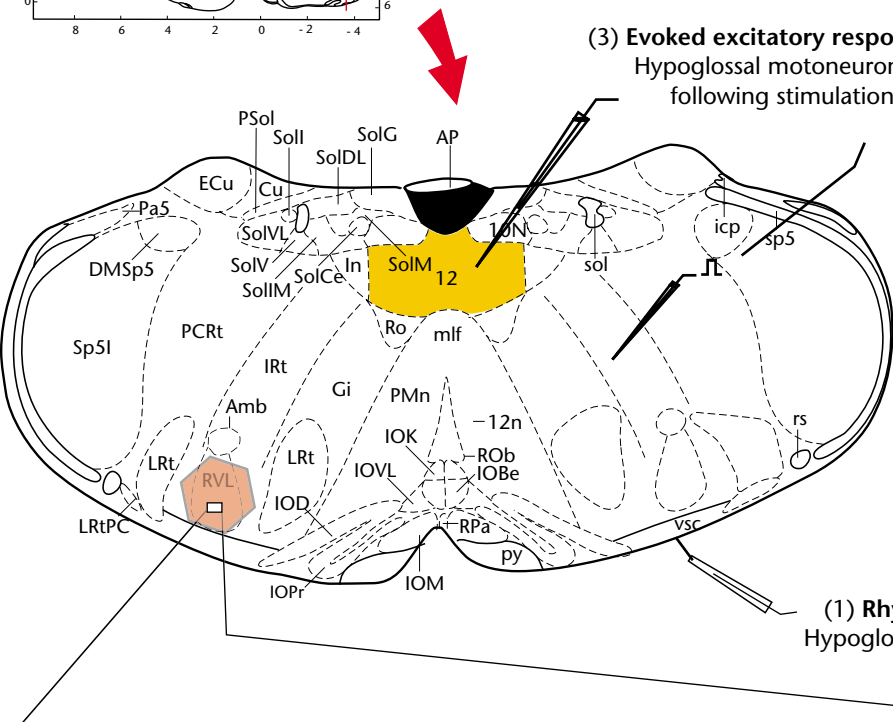

**(3) Evoked excitatory responses:**  
 Hypoglossal motoneurons  
 following stimulation

**(1) Rhythmic activity:**  
 Hypoglossal nerve rootlets

**(2) Mini recordings & high-voltage activated Ca<sup>2+</sup> currents:**  
 pre-Böttinger complex

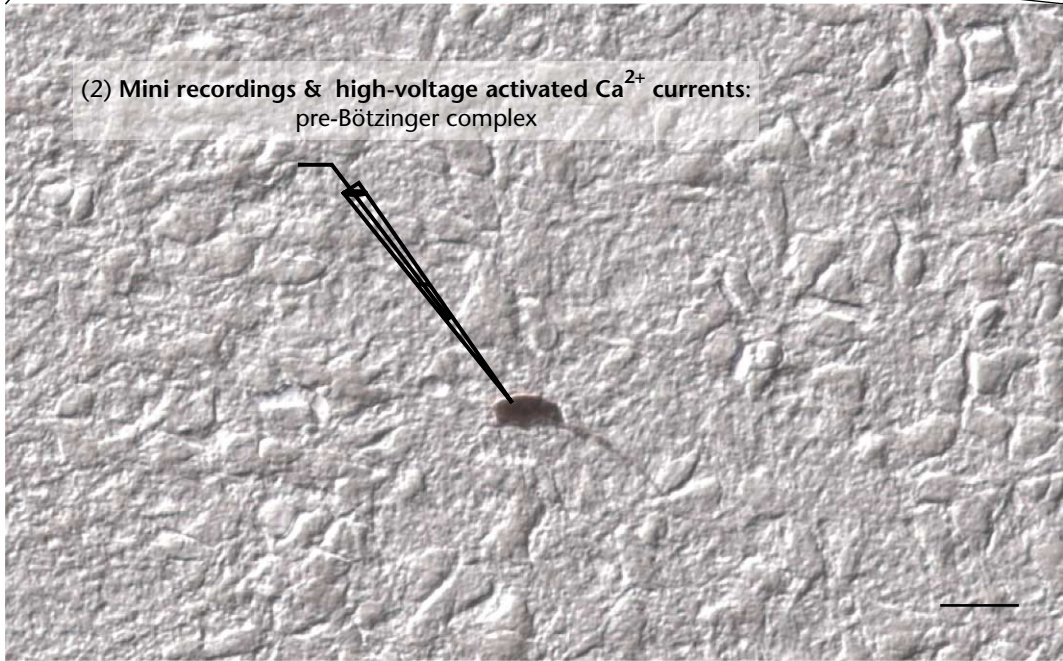

Supplement: 41586_2003_BFnature01755_MOESM7_ESM.pdf [file 41586_2003_BFnature01755_MOESM7_ESM.pdf]
