# Supplementary figures and images for: α-Neurexins couple Ca2+ channels to synaptic vesicle exocytosis
Source: Springer Nature journal article supplement (doi:10.1038/nature01755), 2003-06-01

a

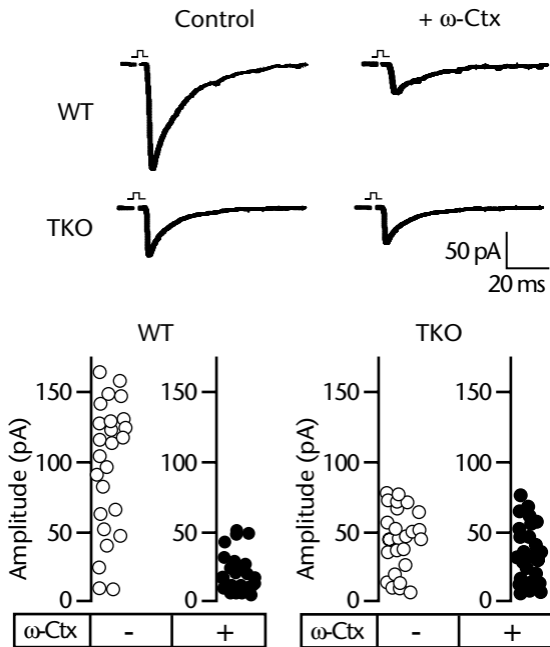

b

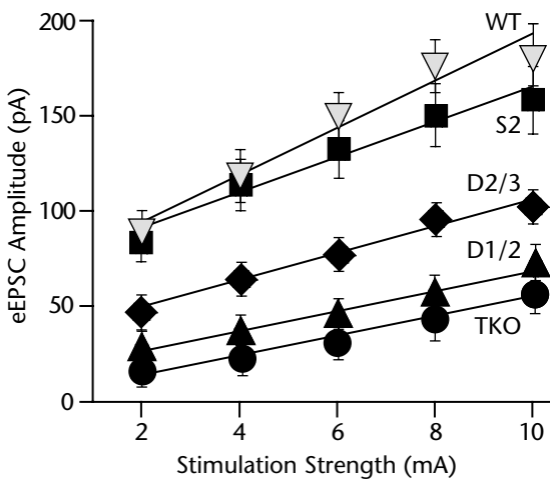

Supplement: 41586_2003_BFnature01755_MOESM10_ESM.pdf [file 41586_2003_BFnature01755_MOESM10_ESM.pdf]

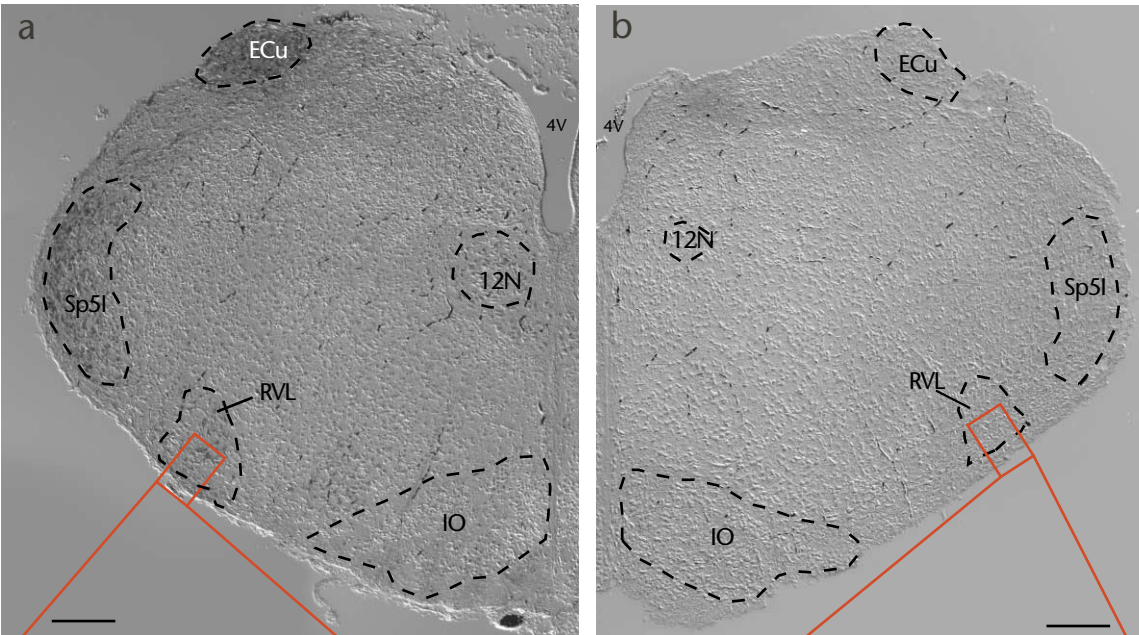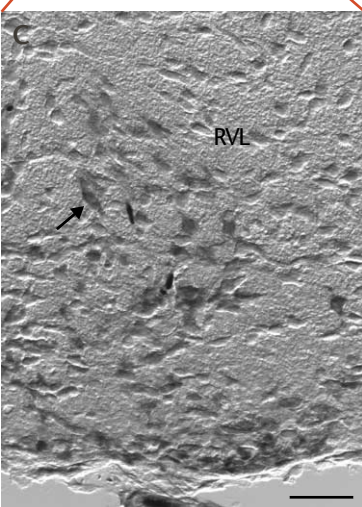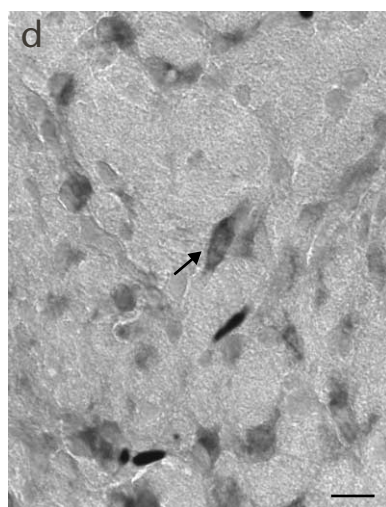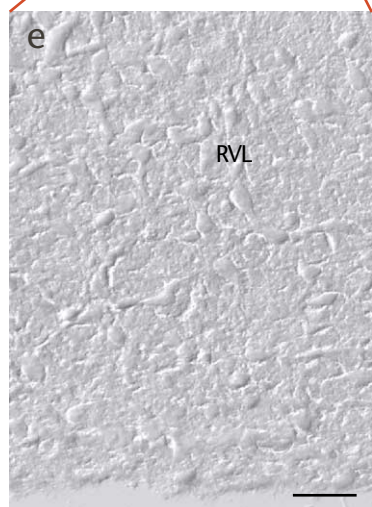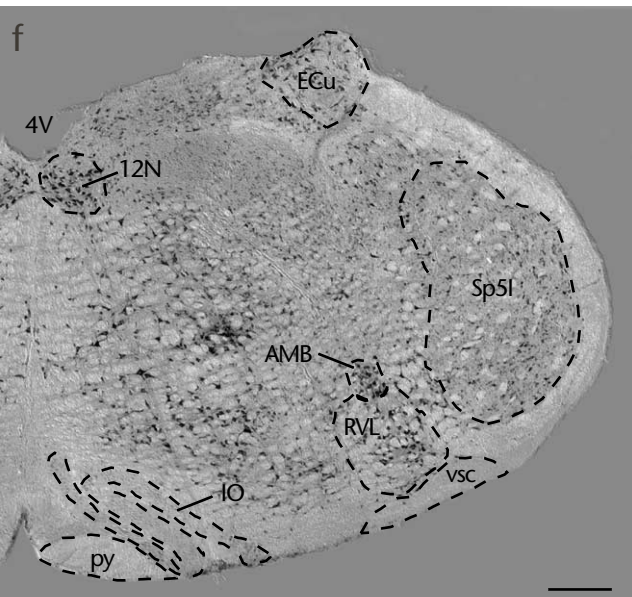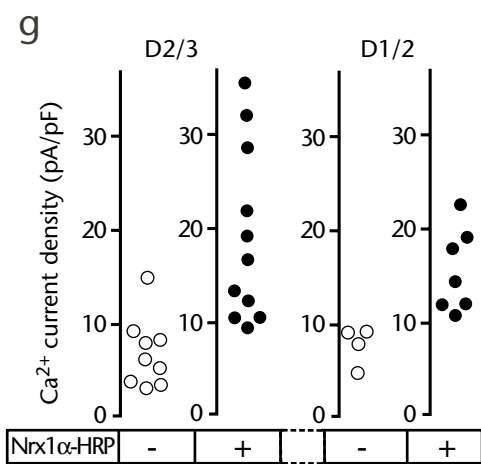

Supplement: 41586_2003_BFnature01755_MOESM11_ESM.pdf [file 41586_2003_BFnature01755_MOESM11_ESM.pdf]

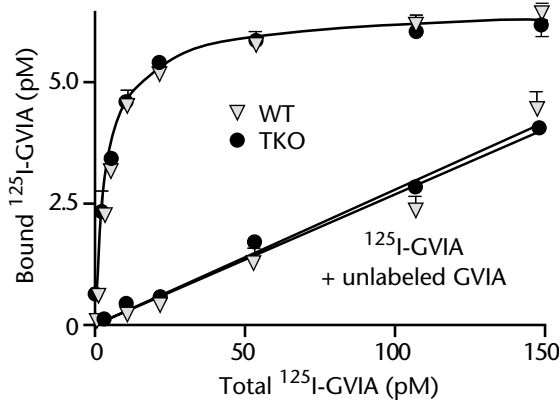

Supplement: 41586_2003_BFnature01755_MOESM12_ESM.pdf [file 41586_2003_BFnature01755_MOESM12_ESM.pdf]

a

Neurexin 2 $\alpha$  Wildtype Allele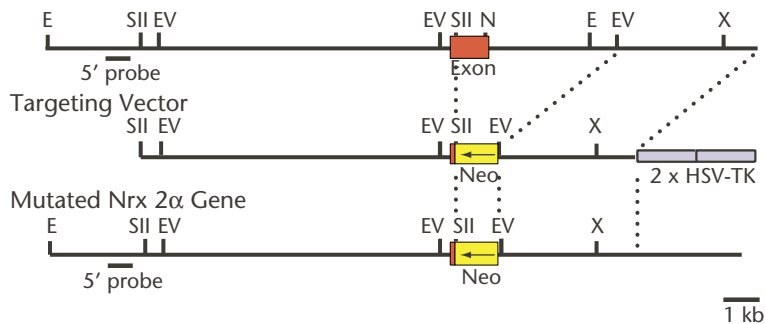

b

Neurexin 3 $\alpha$  Wildtype Allele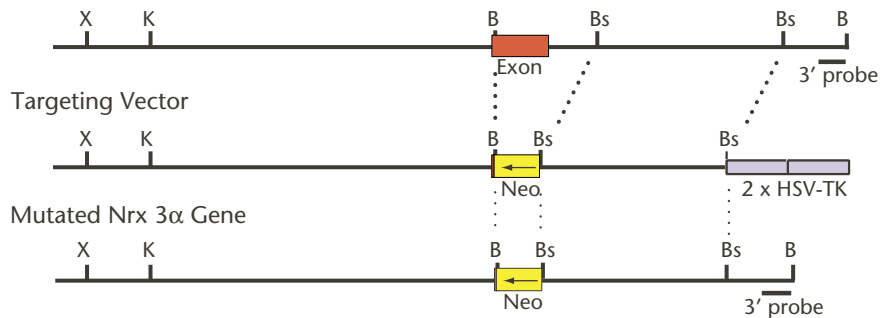

c

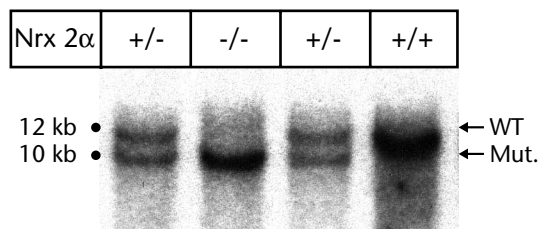

d

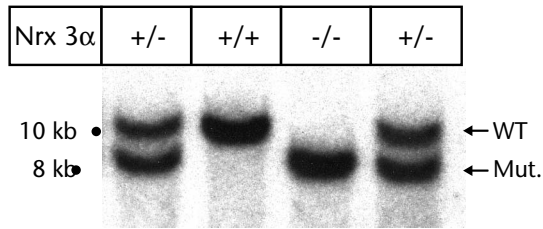

Supplement: 41586_2003_BFnature01755_MOESM1_ESM.pdf [file 41586_2003_BFnature01755_MOESM1_ESM.pdf]

a

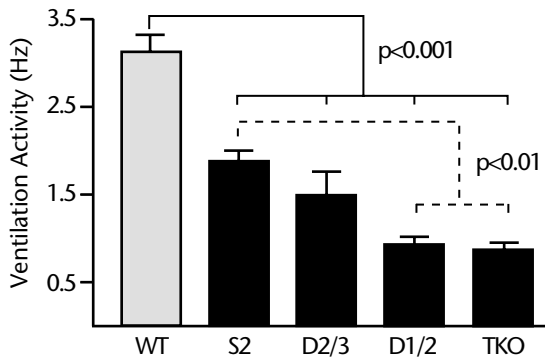

b

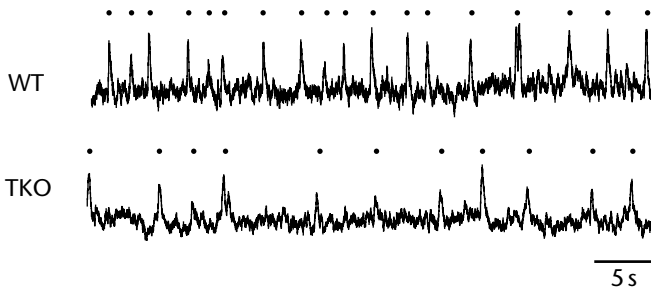

Supplement: 41586_2003_BFnature01755_MOESM2_ESM.pdf [file 41586_2003_BFnature01755_MOESM2_ESM.pdf]

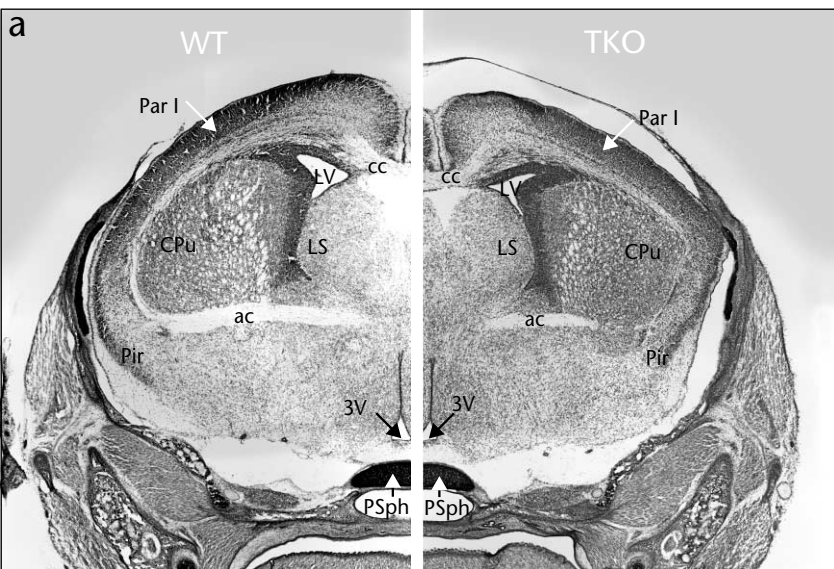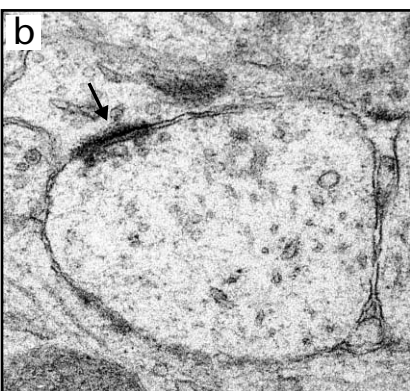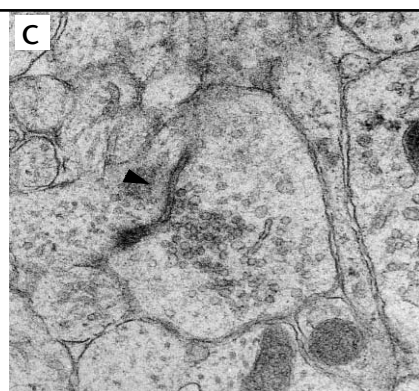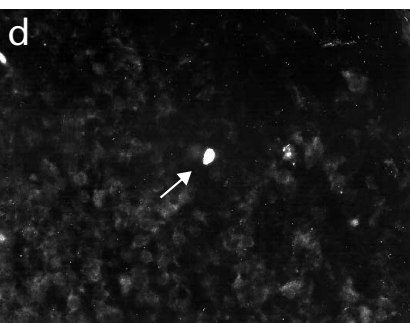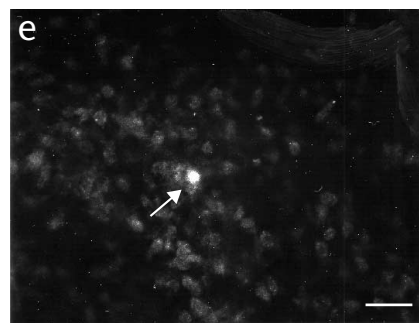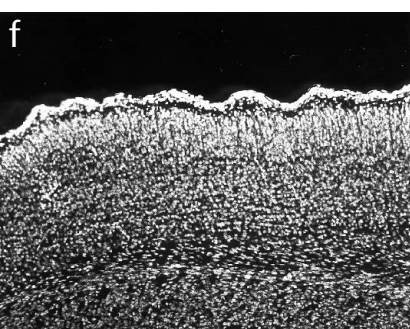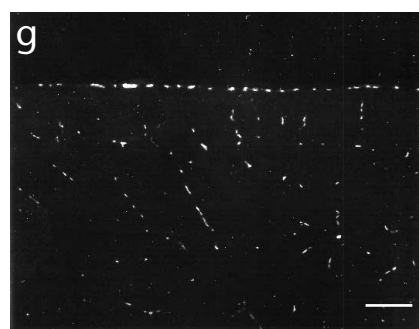

Supplement: 41586_2003_BFnature01755_MOESM3_ESM.pdf [file 41586_2003_BFnature01755_MOESM3_ESM.pdf]

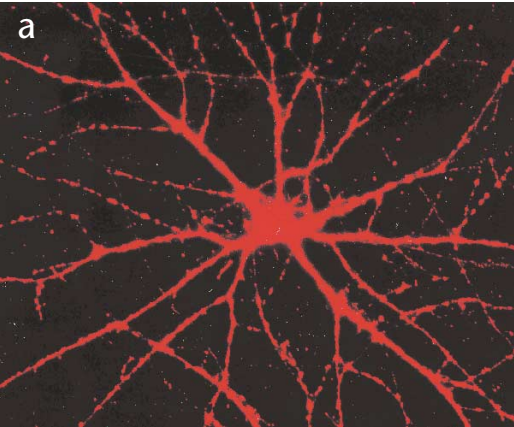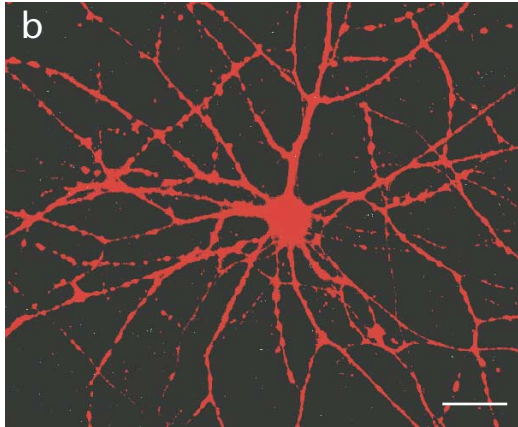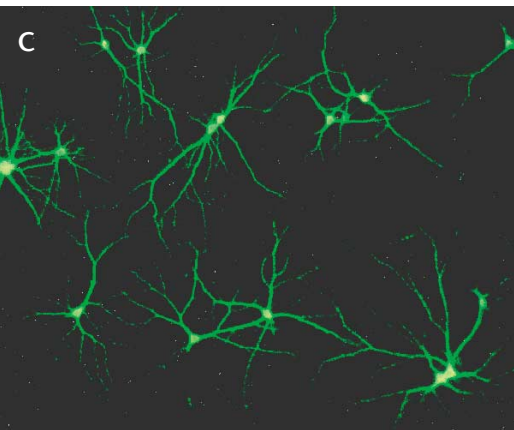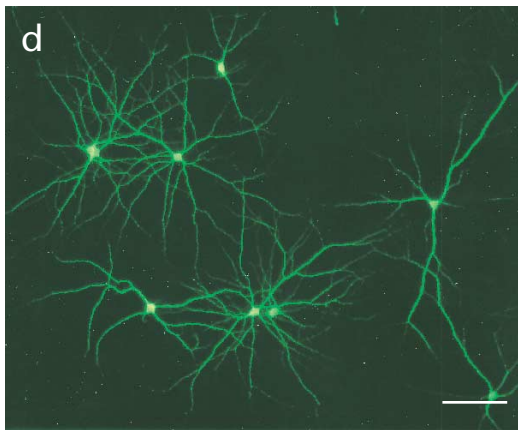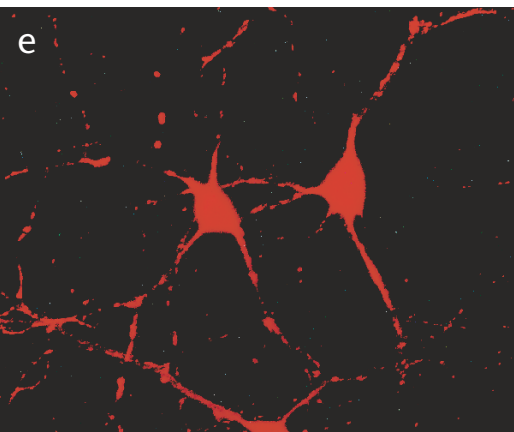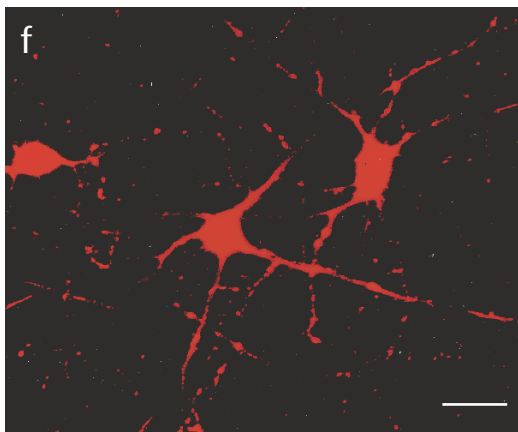

Supplement: 41586_2003_BFnature01755_MOESM4_ESM.pdf [file 41586_2003_BFnature01755_MOESM4_ESM.pdf]

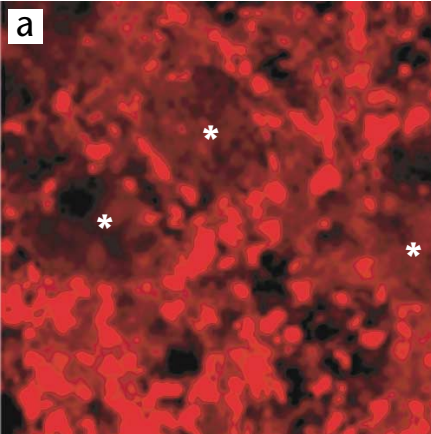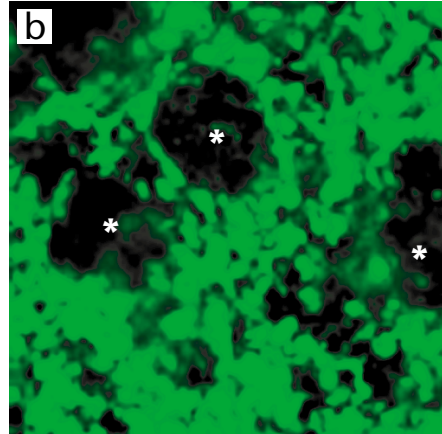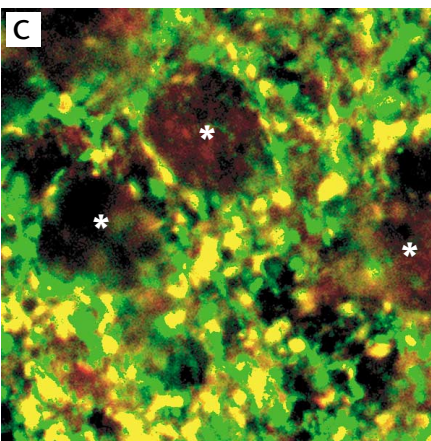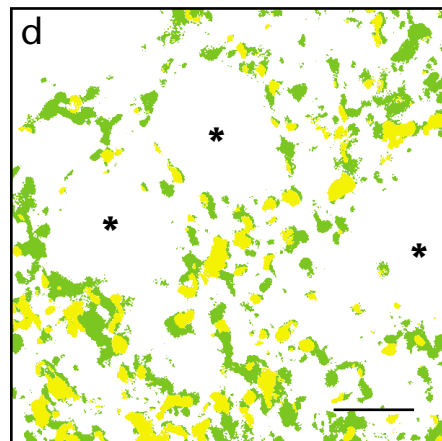

Supplement: 41586_2003_BFnature01755_MOESM5_ESM.pdf [file 41586_2003_BFnature01755_MOESM5_ESM.pdf]

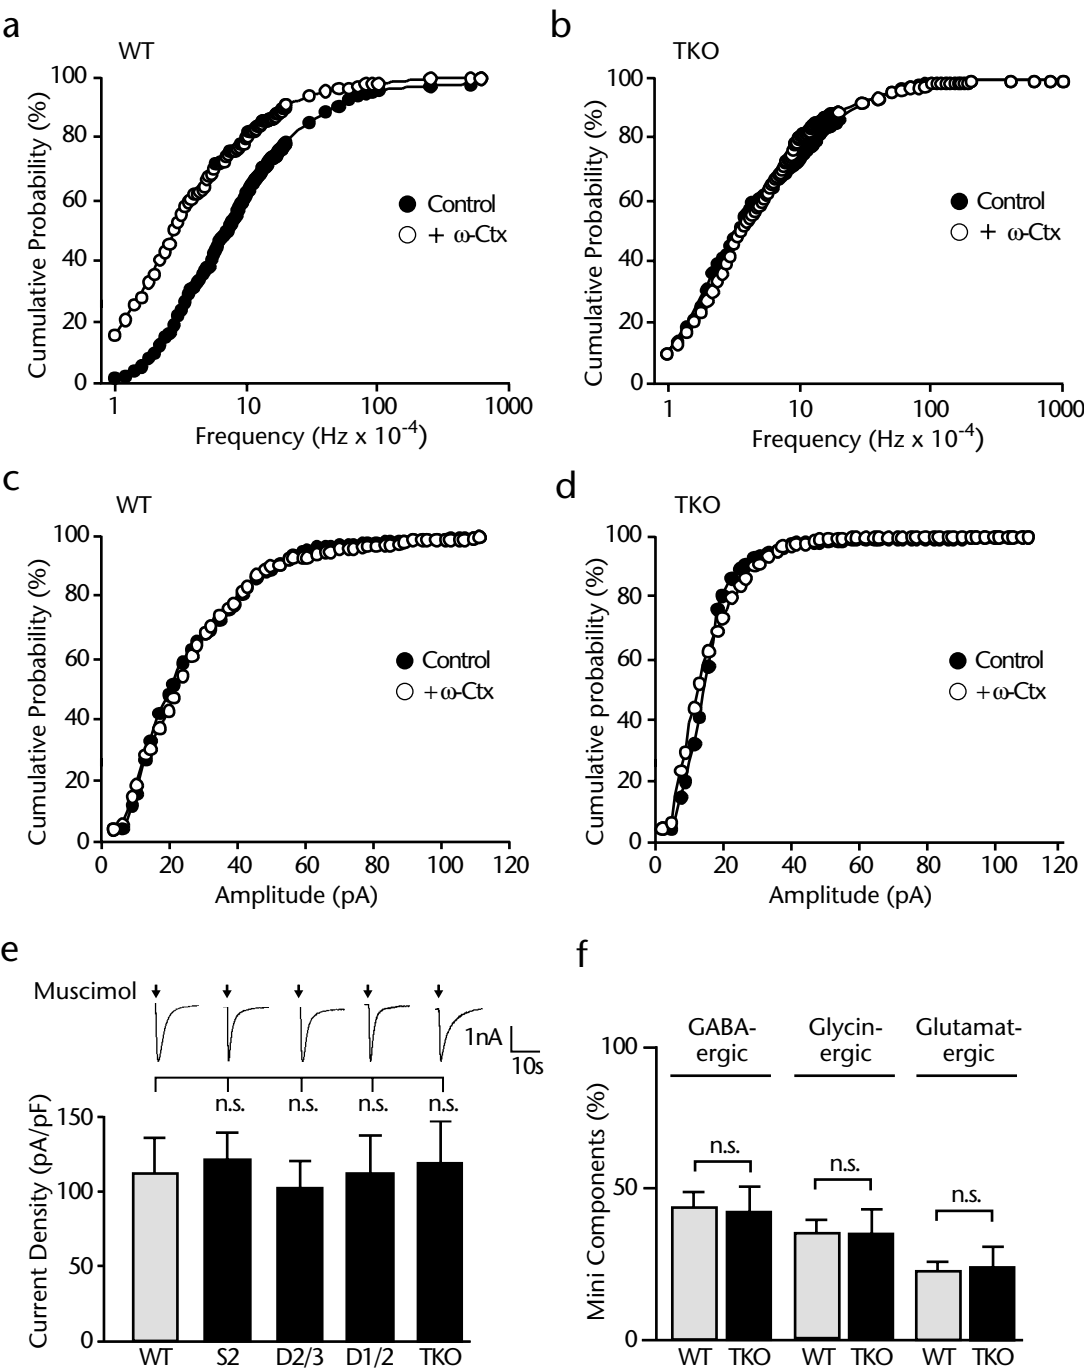

Supplement: 41586_2003_BFnature01755_MOESM8_ESM.pdf [file 41586_2003_BFnature01755_MOESM8_ESM.pdf]

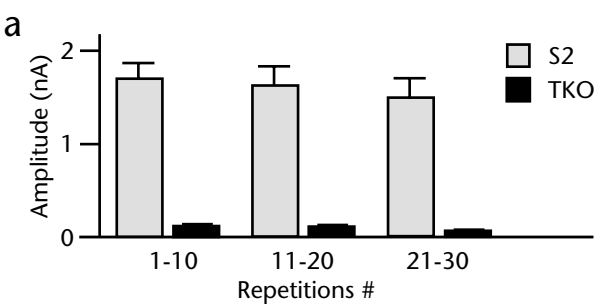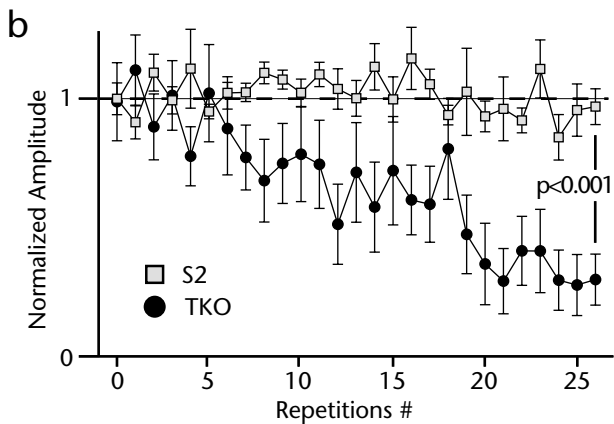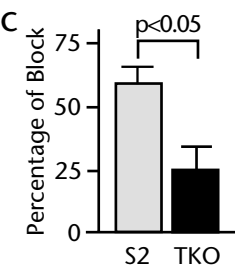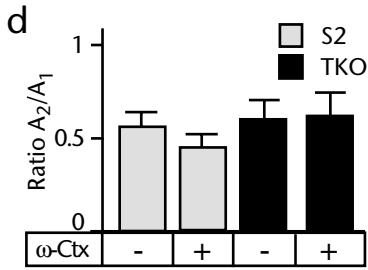

Supplement: 41586_2003_BFnature01755_MOESM9_ESM.pdf [file 41586_2003_BFnature01755_MOESM9_ESM.pdf]
